# Supplementary material
Source: bioRxiv or medRxiv preprint supplement (https://medrxiv.org/highwire/filestream/95123/field_highwire_adjunct_files/0/2020.08.30.20184796-1.pdf)
Supplement: Supplementary file [file 2020.08.30.20184796-1.pdf]

Supplemental Table 1: Primer sequences and final 1X concentrations used in the RT-LAMP reactions.

| Primer name  | Sequence 5'→3'                                          | Final concentration |
|--------------|---------------------------------------------------------|---------------------|
| Gene-N-A-F3  | TGGCTACTACCGAAGAGCT                                     | 0.2uM               |
| Gene-N-A-B3  | TGCAGCATTGTTAGCAGGAT                                    | 0.2uM               |
| Gene-N-A-FIP | TCTGGCCCAGTTCCTAGGTAGTCCAGACGAATTCGTGGTG<br>G           | 1.6uM               |
| Gene-N-A-BIP | AGACGGCATCATATGGGTTGCACGGGTGCCAATGTGATCT                | 1.6uM               |
| Gene-N-A-LF  | GGACTGAGATCTTTCATTTTACCGT                               | 0.4uM               |
| Gene-N-A-LB  | ACTGAGGGAGCCTTGAATACA                                   | 0.4uM               |
| As1e-F3      | CGGTGGACAAATTGTCAC                                      | 0.2uM               |
| As1e-B3      | CTTCTCTGGATTTAACACACTT                                  | 0.2uM               |
| As1e-FIP     | TCAGCACACAAAGCCAAAAATTTATTTTTCTGTGCAAAGG<br>AAATTAAGGAG | 1.6uM               |
| As1e-BIP     | TATTGGTGGAGCTAAACTTAAAGCCTTTTCTGTACAATCC<br>CTTTGAGTG   | 1.6uM               |
| As1e-LF      | TTACAAGCTTAAAGAATGTCTGAACACT                            | 0.4uM               |
| As1e-LB      | TTGAATTTAGGTGAAACATTTGTCACG                             | 0.4uM               |
| Gene-N2-F3   | ACCAGGAACTAATCAGACAAG                                   | 0.2uM               |
| Gene-N2-B3   | GACTTGATCTTTGAAATTTGGATCT                               | 0.2uM               |
| Gene-N2-FIP  | TTCCGAAGAACGCTGAAGCGGAACTGATTACAAACATTGG<br>CC          | 1.6uM               |
| Gene-N2-BIP  | CGCATTGGCATGGAAGTCACAATTTGATGGCACCTGTGTA                | 1.6uM               |
| Gene-N2-LF   | GGGGGCAAATTGTGCAATTTG                                   | 0.4uM               |
| Gene-N2-LB   | CTTCGGGAACGTGGTTGACC                                    | 0.4uM               |
| Gene-E1-F3   | TGAGTACGAACTTATGTACTCAT                                 | 0.2uM               |
| Gene-E1-B3   | TTCAGATTTTTAACACGAGAGT                                  | 0.2uM               |
| Gene-E1-FIP  | ACCACGAAAGCAAGAAAAAGAAGTTCGTTTCGGAAGAGAC<br>AG          | 1.6uM               |
| Gene-E1-BIP  | TTGCTAGTTACACTAGCCATCCTTAGGTTTTACAAGACTC<br>ACGT        | 1.6uM               |

|                 |                                               |       |
|-----------------|-----------------------------------------------|-------|
| Gene-E1-LF      | CGCTATTAACTATTAACG                            | 0.4uM |
| Gene-E1-LB      | GCGCTTCGATTGTGTGCGT                           | 0.4uM |
| Color-N-F3      | AACACAAGCTTTCGGCAG                            | 0.2uM |
| Color-N-B3      | GAAATTTGGATCTTTGTCATCC                        | 0.2uM |
| Color-N-FIP     | TGCGGCCAATGTTTGTAAATCAGCCAAGGAAATTTGGGGA<br>C | 1.6uM |
| Color-N-BIP     | CGCATTGGCATGGAAGTCACTTTGATGGCACCTGTGTAG       | 1.6uM |
| Color-N-LF      | TTCCTTGTCTGATTAGTTC                           | 0.8uM |
| Color-N-LB      | ACCTTCGGGAACGTGGTT                            | 0.8uM |
| Color-E-F3      | CCGACGACGACTACTAGC                            | 0.2uM |
| Color-E-B3      | AGAGTAAACGTAAAAAGAAGGTT                       | 0.2uM |
| Color-E-FIP     | ACCTGTCTCTTCCGAAACGAATTTGTAAGCACAAGCTGAT<br>G | 1.6uM |
| Color-E-BIP     | CTAGCCATCCTTACTGCGCTACTCACGTTAACAATATTGC<br>A | 1.6uM |
| Color-E-LF      | TCGATTGTGTGCGTACTGC                           | 0.8uM |
| Color-E-LB      | TGAGTACATAAGTTCGTAC                           | 0.8uM |
| Color-ORF1a-F3  | TCCAGATGAGGATGAAGAAGA                         | 0.2uM |
| Color-ORF1a-B3  | AGTCTGAACAACCTGGTGTAAAG                       | 0.2uM |
| Color-ORF1a-FIP | AGAGCAGCAGAAGTGGCACAGGTGATTGTGAAGAAGAAGA<br>G | 1.6uM |
| Color-ORF1a-BIP | TCAACCTGAAGAAGAGCAAGAAGTATTGTCCTCACTGCC       | 1.6uM |
| Color-ORF1a-LF  | CTCATATTGAGTTGATGGCTCA                        | 0.8uM |
| Color-ORF1a-LB  | ACAAACTGTTGGTCAACAAGAC                        | 0.8uM |
| Lamb-ORF1a-F3   | TCCAGATGAGGATGAAGAAGA                         | 0.2uM |
| Lamb-ORF1a-B3   | AGTCTGAACAACCTGGTGTAAAG                       | 0.2uM |
| Lamb-ORF1a-FIP  | AGAGCAGCAGAAGTGGCACAGGTGATTGTGAAGAAGAAGAG     | 1.6uM |
| Lamb-ORF1a-BIP  | TCAACCTGAAGAAGAGCAAGAAGTATTGTCCTCACTGCC       | 1.6uM |
| Lamb-ORF1a-LF   | CTCATATTGAGTTGATGGCTCA                        | 0.4uM |
| Lamb-ORF1a-LB   | ACAAACTGTTGGTCAACAAGAC                        | 0.4uM |

|                      |                                                      |       |
|----------------------|------------------------------------------------------|-------|
| Yu-ORF1a-F3          | CCACTAGAGGAGCTACTGTA                                 | 0.2uM |
| Yu-ORF1a-B3          | TGACAAGCTACAACACGT                                   | 0.2uM |
| Yu-ORF1a-FIP         | AGGTGAGGGTTTTCTACATCACTATATTGGAACAAGCAAAT<br>TCTATGG | 1.6uM |
| Yu-ORF1a-BIP         | ATGGGTTGGGATTATCCTAAATGTGTGCGAGCAAGAACAAG<br>TG      | 1.6uM |
| Yu-ORF1a-LF          | CAGTTTTTAACATGTTGTGCCAACC                            | 0.4uM |
| Yu-ORF1a-LB          | TAGAGCCATGCCTAACATGCT                                | 0.4uM |
| El-Tholoth-ORF1a-F3  | TGCTTCAGTCAGCTGATG                                   | 0.2uM |
| El-Tholoth-ORF1a-B3  | TTAAATTGTCATCTTCGTCCTT                               | 0.2uM |
| El-Tholoth-ORF1a-FIP | TCAGTACTAGTGCCTGTGCCACAATCGTTTTTAAACGGGT             | 1.6uM |
| El-Tholoth-ORF1a-BIP | TCGTATACAGGGCTTTTGACATCTATCTTGAAGCGACAAC<br>AA       | 1.6uM |
| El-Tholoth-ORF1a-LF  | CTGCACTTACACCGCAA                                    | 0.8uM |
| El-Tholoth-ORF1a-LB  | GTAGCTGGTTTTGCTAAATTCC                               | 0.8uM |
| Gene-ORF1a-A-F3      | CTGCACCTCATGGTCATGTT                                 | 0.2uM |
| Gene-ORF1a-A-B3      | AGCTCGTCGCCTAAGTCAA                                  | 0.2uM |
| Gene-ORF1a-A-FIP     | GAGGGACAAGGACACCAAGTGTATGGTTGAGCTGGTAGCAG<br>A       | 1.6uM |
| Gene-ORF1a-A-BIP     | CCAGTGGCTTACCGCAAGGTTTTAGATCGGCGCCGTAAC              | 1.6uM |
| Gene-ORF1a-A-LF      | CCGTACTGAATGCCTTCGAGT                                | 0.4uM |
| Gene-ORF1a-A-LB      | TTCGTAAGAACGGTAATAAAGGAGC                            | 0.4uM |

Supplemental Table 2: qRT-PCR N-gene viral loads and RT-LAMP Cq values from 106 primary NP swab samples run in duplicate with 1ul of swab sample or a subset of NP swab samples run in duplicate with either 1ul of primary samples treated with Lucigen QuickExtract or 5ul of extracted vRNA. R1 is replicate 1 and R2 is replicate 2.

| <b>Sample</b> | <b>vRNA<br/>copies/ml</b> | <b>1ul<br/>swab<br/>R1<br/>(Cq)</b> | <b>1ul<br/>swab<br/>R2 (Cq)</b> | <b>Lucigen<br/>R1 (Cq)</b> | <b>Lucigen<br/>R2 (Cq)</b> | <b>5ul<br/>RNA<br/>R1<br/>(Cq)</b> | <b>5ul<br/>RNA<br/>R2<br/>(Cq)</b> |
|---------------|---------------------------|-------------------------------------|---------------------------------|----------------------------|----------------------------|------------------------------------|------------------------------------|
| 1             | 738000                    | -                                   | -                               | 43.33                      | -                          | 32.85                              | 31.39                              |
| 2             | 281000                    | -                                   | -                               | -                          | 41.78                      | 31.42                              | 31.68                              |
| 3             | 575000                    | -                                   | 53.74                           | 44.77                      | 58.37                      | 29.72                              | 29.76                              |
| 4             | 3840000                   | 43.36                               | 47.53                           | 34.08                      | 37.66                      | 27.8                               | 27.5                               |
| 5             | 73300                     | -                                   | -                               | -                          | -                          | 44.45                              | -                                  |
| 6             | 10100                     | -                                   | -                               | -                          | 44.41                      | 38.96                              | -                                  |
| 7             | 652000                    | 67.36                               | -                               | 38.62                      | 46.43                      | 30.17                              | 29.76                              |
| 8             | 1130000                   | -                                   | 44.47                           | 40.65                      | 42.72                      | 29.1                               | 28.51                              |
| 9             | 14100                     | -                                   | -                               | -                          | -                          | 34.76                              | -                                  |
| 10            | 319000                    | -                                   | -                               | 45.5                       | 47.87                      | 30.37                              | 31.86                              |
| 11            | 2600000                   | -                                   | -                               | 38.02                      | 44.44                      | 28.92                              | 28.6                               |
| 12            | 574000                    | -                                   | -                               | 48.37                      | 41.49                      | 29.45                              | 29.95                              |
| 13            | 1080000                   | 52.88                               | -                               | 33.49                      | 35.1                       | 28.88                              | 28.78                              |
| 14            | 6.19e+008                 | -                                   | -                               | -                          | -                          | -                                  | -                                  |
| 15            | 8030000                   | 38.64                               | 44.91                           | 41.65                      | 39.68                      | 26.82                              | 26.78                              |
| 16            | 784000                    | -                                   | -                               | 44.92                      | -                          | 30.14                              | 30.16                              |
| 17            | 148000                    | -                                   | -                               | -                          | -                          | 33.23                              | 34.63                              |
| 18            | 78100                     | -                                   | -                               | -                          | -                          | 37.96                              | 33.64                              |
| 19            | 23700                     | -                                   | -                               | -                          | -                          | -                                  | -                                  |
| 20            | 3.35e+010                 | 24.52                               | 24.78                           | 19.67                      | 19.21                      | 17.16                              | 17.09                              |
| 21            | 6980000                   | -                                   | 51.09                           | 35.5                       | 45.77                      | 28.69                              | 29.35                              |
| 22            | 139000                    | -                                   | -                               | -                          | -                          | 43.07                              | 36.92                              |

---

|    |           |       |       |       |       |       |       |
|----|-----------|-------|-------|-------|-------|-------|-------|
| 23 | 9580000   | -     | 54.85 | 29.85 | 32.73 | 28.15 | 28.35 |
| 24 | 6.71e+009 | 27.42 | 27.26 | 20.75 | 20.81 | 19.36 | 19.42 |
| 25 | 4.58e+009 | 30.2  | 30.06 | 22.65 | 22.37 | 20.11 | 20.19 |
| 26 | 5.98e+008 | 35.79 | 27.98 | 23.17 | 24.49 | 22.82 | 22.95 |
| 27 | 2.35e+009 | 28.6  | 29.57 | 22.72 | 22.62 | 20.98 | 20.86 |
| 28 | 5.68e+008 | 30.15 | 28.59 | 23.81 | 23.76 | 22.88 | 22.64 |
| 29 | 37600     | -     | -     | -     | -     | -     | -     |
| 30 | 2.59e+007 | 33.81 | 36.36 | 27.16 | 28.21 | 26.6  | 26.6  |
| 31 | 1.14e+010 | 26.86 | 23.26 | 18.39 | 18.96 | 18.66 | 18.46 |
| 32 | 29600     | -     | -     | -     | -     | 36.91 | 39.2  |
| 33 | 584000    | -     | -     | -     | -     | 33.22 | 33.92 |
| 34 | 1.12e+009 | 29.22 | 27.97 | 22.35 | 22.36 | 21.41 | 21.36 |
| 35 | 3.71e+008 | 32.39 | 29.99 | 26    | 24.98 | 23.06 | 23.01 |
| 36 | 2.2e+007  | 47.59 | -     | 28.54 | 28.66 | 27.34 | 27.4  |
| 37 | 16400     | -     | -     | -     | -     | -     | -     |
| 38 | 1.07e+008 | 37.2  | 38.36 | 25.61 | 27.88 | 25.2  | 25.37 |
| 39 | 1.55e+008 | 34.57 | 33.19 | 25.19 | 25.74 | 25    | 24.83 |
| 40 | 7.97e+007 | 37.82 | 33.13 | 26.72 | 26.72 | 25.83 | 25.7  |
| 41 | 9870000   | 37.4  | 35.99 | 30.93 | 32.78 | 29.3  | 28.79 |
| 42 | 1.34e+008 | 30.88 | 40.14 | 25.54 | 25.01 | 24.32 | 24.17 |
| 43 | 4.79e+007 | 39.89 | 37.93 | 25.78 | 27.83 | 26.05 | 26.05 |
| 44 | 416000    | -     | -     | -     | -     | 26.05 | 42.35 |
| 45 | 473000    | -     | -     |       |       |       |       |
| 46 | 168000    | -     | -     |       |       |       |       |
| 47 | 33900     | -     | -     |       |       |       |       |
| 48 | 8230000   | 40.54 | 38.05 |       |       |       |       |
| 49 | 790000    | -     | -     |       |       |       |       |
| 50 | 139000    | -     | -     |       |       |       |       |

---

---

|    |           |       |       |       |       |
|----|-----------|-------|-------|-------|-------|
| 51 | 9870000   | 38.75 | -     |       |       |
| 52 | 1380000   | -     | -     |       |       |
| 53 | 489000    | 36.08 | -     |       |       |
| 54 | 5030000   | 37.64 | -     |       |       |
| 55 | 31000     | -     | -     |       |       |
| 56 | 76500     | -     | -     |       |       |
| 57 | 4.44e+009 | 24.29 | 24.73 | 20.03 | 20.6  |
| 58 | 1.49e+009 | 26.5  | 27.33 | 21.47 | 21.69 |
| 59 | 1.84e+009 | 25.91 | 25.13 | 20.78 | 20.59 |
| 60 | 9890000   | 34.08 | 33.42 | 26.29 | 26.54 |
| 61 | 1.21e+007 | 30.34 | 35.61 | 27.92 | 21.81 |
| 62 | 2.52e+007 | 32.41 | 35.73 | 25.37 | 27.1  |
| 63 | 5010000   | 35.67 | 37.97 | 29.74 | 29.78 |
| 64 | 3.53e+007 | 31.06 | 31.26 | 23.93 | 24.79 |
| 65 | 6370000   | 33.64 | 34.33 | 28.72 | 29.75 |
| 66 | 8.03e+008 | 27.21 | 27.88 | 21.92 | 21.21 |
| 67 | 8.77e+008 | 27.65 | 27.26 | 22.08 | 22.14 |
| 68 | 2.8e+008  | 28.32 | 27.56 | 21.73 | 22.46 |
| 69 | 1.33e+008 | 29.76 | 30.17 | 24.34 | 25.2  |
| 70 | 1.03e+009 | 27.28 | 28.2  | 22.28 | 22.13 |
| 71 | 3.05e+007 | 33.77 | 36.05 | 27.93 | 27.1  |
| 72 | 4.06e+008 | 30.29 | 29.87 | 22.87 | 22.78 |
| 73 | 1.94e+009 | 27.29 | 27.07 | 22.81 | 21.52 |
| 74 | 1.22e+009 | 26.37 | 27.56 | 22.52 | 22.48 |
| 75 | 6.58e+008 | 27.98 | 27.82 | 22.31 | 22.54 |
| 76 | 1.21e+009 | 28.53 | 27.59 | 22.26 | 22.51 |
| 77 | 1.57e+009 | 27.68 | 27.78 | 22.53 | 23.74 |
| 78 | 1.34e+009 | 28.33 | 27.6  | 22.22 | 22.11 |

---

---

|     |           |       |       |       |       |
|-----|-----------|-------|-------|-------|-------|
| 79  | 9110000   | 37.97 | 41.43 | 30.9  | 31.06 |
| 80  | 7.95e+008 | 27.94 | 28.73 | 23.06 | 23.2  |
| 81  | 6750000   | -     | -     | 40.59 | 37.48 |
| 82  | 1350000   | -     | -     | 34.49 | 41.28 |
| 83  | 9790000   | 40.64 | 44.94 | 27.6  | 30.07 |
| 84  | 6.37e+008 | 28.69 | 27.46 | 22.35 | 21.34 |
| 85  | 1.24e+007 | -     | 40.41 |       |       |
| 86  | 4.59e+008 | 25.57 | 24.92 |       |       |
| 87  | 9710000   | 23.23 | 23.98 |       |       |
| 88  | 4.38e+008 | 23.63 | 25.47 |       |       |
| 89  | 1.64e+009 | 28.4  | 27.3  |       |       |
| 90  | 4650      | -     | -     |       |       |
| 91  | 1.52e+008 | 26.78 | 26.16 |       |       |
| 92  | 1.61e+009 | 24.71 | 25.2  |       |       |
| 93  | 7.97e+007 | 29.31 | 30.2  |       |       |
| 94  | 5.31e+007 | 41.39 | 36.57 |       |       |
| 95  | 1.42e+009 | 23.65 | 24.35 |       |       |
| 96  | 5.16e+007 | 29.88 | 33.12 |       |       |
| 97  | 6.47e+007 | 32.23 | 30.38 |       |       |
| 98  | 3.14e+009 | 23.07 | 23.14 |       |       |
| 99  | 5.89e+008 | 24.58 | 22.74 |       |       |
| 100 | 7.09e+009 | 21.3  | 24.46 |       |       |
| 101 | 3390000   | 35.59 | 74.32 |       |       |
| 102 | 2230000   | 44.09 | -     |       |       |
| 103 | 1.1e+007  | 35.41 | 38.99 |       |       |
| 104 | 1.21e+007 | 36.21 | -     |       |       |
| 105 | 1.66e+008 | 30.59 | 35.35 |       |       |
| 106 | 1.57e+008 | 31.51 | 34.23 |       |       |

---

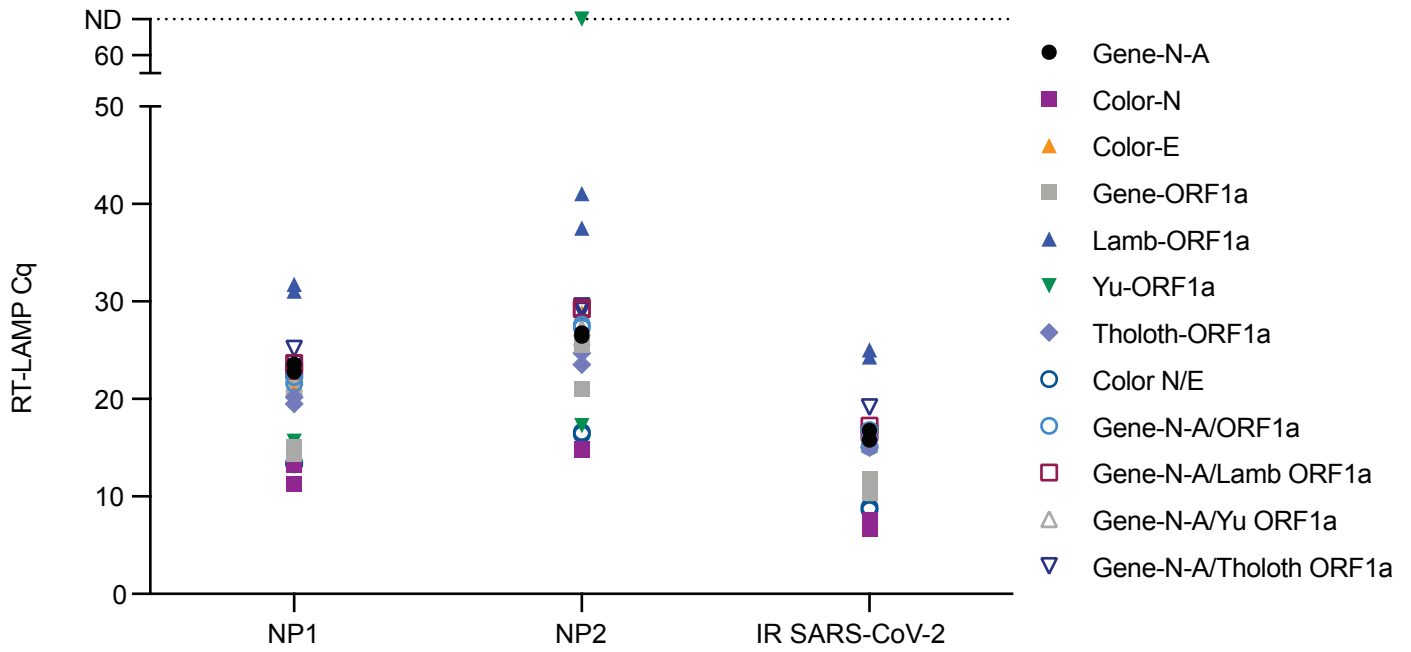

Supplemental Figure 1: Comparison of Gene-N-A, Color-N, and Color-E primers to several ORF1a -targeting primer sets and combinations with two primary samples and irradiated SARS-CoV-2. Samples that were not detectable were plotted on the ND line set at Cq 80, the highest cycle number in our assay.
